# Supplementary material for: Concentric-mineralized hybrid silk-based scaffolds for bone tissue engineeringin vitromodels
Source: Royal Society of Chemistry journal article supplement (doi:10.1039/d3tb00717k), 2023-01-01
Supplement: d3tb00717k1.pdf [file d3tb00717k1.pdf]

| <b>SCAFFOLD</b> | <b>RA</b>      | <b>SD (<math>\pm</math>)</b> | <b>RSK</b>    | <b>RKU</b>    |
|-----------------|----------------|------------------------------|---------------|---------------|
| <b>SILK</b>     | <b>102.229</b> | <b>37.593</b>                | <b>-0.643</b> | <b>1.274</b>  |
| <b>HYBRID</b>   | <b>117.891</b> | <b>74.201</b>                | <b>-0.134</b> | <b>-1.124</b> |

ESI.1. Scaffolds roughness characterization. Roughness analysis at 10 weeks of co-cultured scaffolds with hMSC-derived osteoblasts & THP-1-derived osteoclasts.
