# Supplementary material for: Concentric-mineralized hybrid silk-based scaffolds for bone tissue engineeringin vitromodels
Source: Royal Society of Chemistry journal article supplement (doi:10.1039/d3tb00717k), 2023-01-01
Supplement: d3tb00717k2.pdf [file d3tb00717k2.pdf]

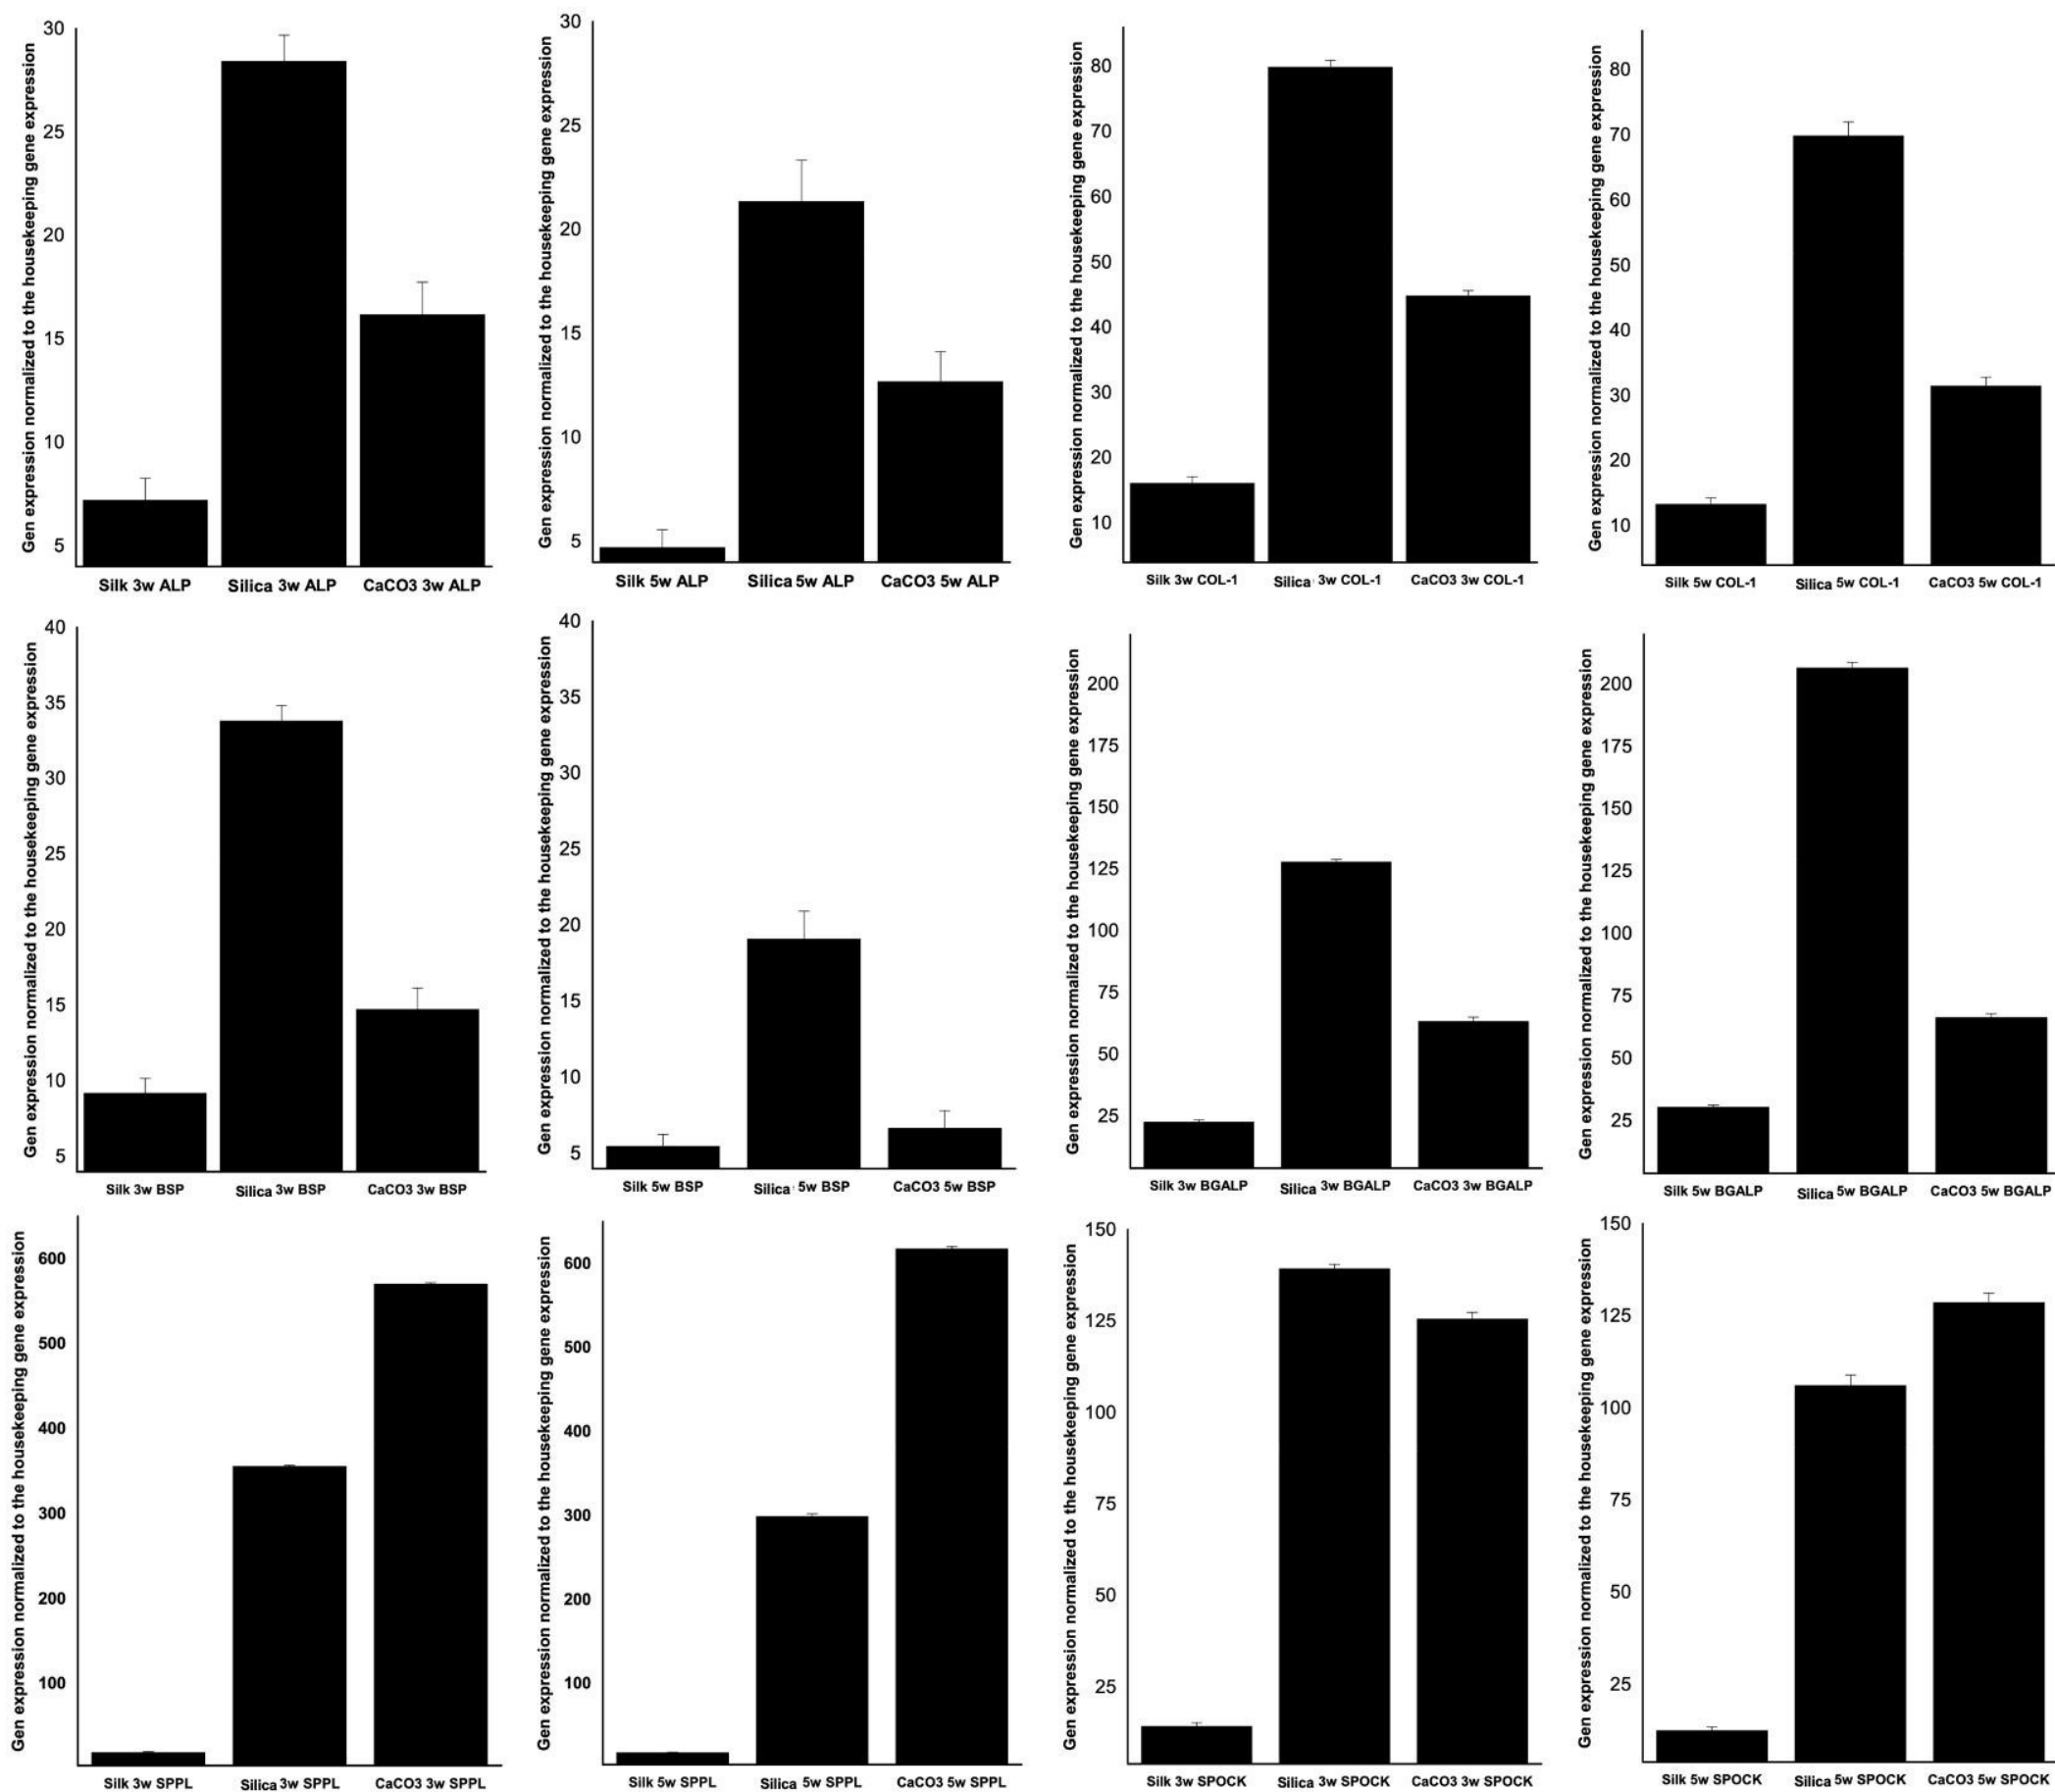

ESI. 2. Statistical analysis for gene expression of 3w and 5w Silica and CaCO<sub>3</sub> Co-cultured systems relative to the normalizing pure silk by each gen is shown. At 0.05 level, the population means are significantly different for all the systems analyzed under One-Way ANOVA with Tukey and Fisher pos hoc treatment, except for BSP expression from CaCO<sub>3</sub> matrices after 5w of Co-culture.
